# Supplementary material for: Structural dynamics of mixed-subunit CaMKIIα/β heterododecamers filmed by high-speed AFM
Source: Research Square preprint supplement (doi:10.21203/rs.3.rs-6519178/v1), 2025-05-21
Supplement: Supplementary file [file 7647269088dabb7b7117f3cb.pdf]

## Supplementary information

# Structural dynamics of mixed-subunit CaMKII $\alpha/\beta$ heterododecamers filmed by high- speed AFM

Keisuke Matsushima, Takashi Sumikama, Taisei Suzuki, Mizuho Ito, Yutaro Nagasawa,  
Ayumi Sumino, Holger Flechsig, Tomoki Ogoshi, Kenichi Umeda, Noriyuki Kodera, Hideji  
Murakoshi, and Mikihiro Shibata

### **Supplementary Video legends**

**Supplementary Video 1. HS-AFM videos of three representative CaMKII $\beta$  homooligomers on a P[5]A+-modified mica surface.** The trajectories of the kinase domains are shown on the right. Image size, 360  $\times$  98 pixels<sup>2</sup> (acquired in HS-AFM observations); scan area, 80  $\times$  68 or 69 nm<sup>2</sup>; frame rate, 3.3 fps.

**Supplementary Video 2. HS-AFM videos of three representative CaMKII $\beta$  homooligomers with 50  $\mu$ M bosutinib on a P[5]A+-modified mica surface.** The trajectories of the kinase domains are shown on the right. Image size, 240  $\times$  96 pixels<sup>2</sup> (acquired in HS-AFM observations); scan area, 80  $\times$  64 nm<sup>2</sup>; frame rate, 3.3 fps.

**Supplementary Video 3. HS-AFM videos of three representative CaMKII $\alpha/\beta$  3:1 heterooligomers on a P[5]A+-modified mica surface.** The trajectories of the kinase domains are shown on the right. Green arrowheads indicate the kinase domains of CaMKII $\beta$  subunits. Image size, 240  $\times$  96 pixels<sup>2</sup> (acquired in HS-AFM observations); scan area, 80  $\times$  64 nm<sup>2</sup>; frame rate, 3.3 fps.

**Supplementary Video 4. HS-AFM videos of three representative CaMKII $\alpha$ /GFP-CaMKII $\beta$  3:1 heterooligomers on a P[5]A+-modified mica surface.** The trajectories of the kinase domains are shown on the right. Green arrowheads and arrows indicate the kinase domains of CaMKII $\beta$  subunits and GFP, respectively. Image size, 120  $\times$  96 pixels<sup>2</sup> (acquired in HS-AFM observations); scan area, 80  $\times$  64 nm<sup>2</sup> or 100  $\times$  80 nm<sup>2</sup>; frame rate, 3.3 fps.

**Supplementary Video 5. HS-AFM videos of three representative CaMKII $\beta$  homooligomers treated with Ca<sup>2+</sup>/CaM (1 mM Ca<sup>2+</sup> and 800 nM CaM) on a P[5]A+-modified mica surface.** The trajectories of the kinase domains are shown on the right. White dotted circles indicate Ca<sup>2+</sup>/CaM bound to the kinase domains, and blue dotted squares indicate kinase domain complexes. Image size, 360  $\times$  96 pixels<sup>2</sup> (acquired in HS-AFM observations); scan area, 80  $\times$  82 or 80 nm<sup>2</sup>; frame rate, 3.3 fps.

**Supplementary Video 6. HS-AFM videos of three representative CaMKII $\alpha/\beta$  3:1 heterooligomers treated with Ca<sup>2+</sup>/CaM (1 mM Ca<sup>2+</sup> and 800 nM CaM) on a P[5]A+-modified mica surface.** The trajectories of the kinase domains are shown on the right. Green arrowheads indicate the kinase domains of CaMKII $\beta$  subunits. White dotted circles indicate Ca<sup>2+</sup>/CaM bound to the kinase domains, and blue dotted squares indicate

kinase domain complexes. Image size,  $240 \times 96$  pixels<sup>2</sup> (acquired in HS-AFM observations); scan area,  $80 \times 64$  nm<sup>2</sup>; frame rate, 3.3 fps.

**Supplementary Video 7. HS-AFM videos of three representative CaMKII $\beta$  homooligomers treated with Ca<sup>2+</sup>/CaM and ATP (1 mM Ca<sup>2+</sup>, 800 nM CaM, and 1 mM ATP) on a P[5]A<sup>+</sup>-modified mica surface.** The trajectories of the kinase domains are shown on the right. White dotted circles indicate Ca<sup>2+</sup>/CaM bound to the kinase domains, and blue dotted squares indicate kinase domain complexes. Image size,  $360 \times 96$  pixels<sup>2</sup> (acquired in HS-AFM observations); scan area,  $80 \times 77, 72$  or  $76$  nm<sup>2</sup>; frame rate, 3.3 fps.

**Supplementary Video 8. HS-AFM videos of three representative CaMKII $\alpha/\beta$  3:1 heterooligomers treated with Ca<sup>2+</sup>/CaM and ATP (1 mM Ca<sup>2+</sup>, 800 nM CaM, and 1 mM ATP) on a P[5]A<sup>+</sup>-modified mica surface.** The trajectories of the kinase domains are shown on the right. Green arrowheads indicate the kinase domains of CaMKII $\beta$  subunits. White dotted circles indicate Ca<sup>2+</sup>/CaM bound to the kinase domains, and blue dotted squares indicate kinase domain complexes. Image size,  $240 \times 96$  pixels<sup>2</sup> (acquired in HS-AFM observations); scan area,  $80 \times 64$  or  $100 \times 80$  nm<sup>2</sup>; frame rate, 3.3 fps.

**Supplementary Video 9. HS-AFM videos of three representative CaMKII $\beta$  homooligomers treated with EGTA (2 mM) and ATP (1 mM) after Ca<sup>2+</sup>/CaM/ATP stimulation (1 mM Ca<sup>2+</sup>, 800 nM CaM, and 1 mM ATP) on a P[5]A<sup>+</sup>-modified mica surface.** The trajectories of the kinase domains are shown on the right. Blue dotted squares indicate kinase domain complexes. Image size,  $360 \times 96$  or  $80 \times 73$  pixels<sup>2</sup> (acquired in HS-AFM observations); scan area,  $80 \times 74$  or  $73$  nm<sup>2</sup>; frame rate, 3.3 fps.

**Supplementary Video 10. HS-AFM videos of three representative CaMKII $\alpha/\beta$  3:1 heterooligomers treated with EGTA (2 mM) and ATP (1 mM) after Ca<sup>2+</sup>/CaM/ATP stimulation (1 mM Ca<sup>2+</sup>, 800 nM CaM, and 1 mM ATP) on a P[5]A<sup>+</sup>-modified mica surface.** The trajectories of the kinase domains are shown on the right. Green arrowheads indicate the kinase domains of CaMKII $\beta$  subunits. Blue dotted squares indicate kinase domain complexes. Image size,  $240 \times 96$  or  $120 \times 96$  pixels<sup>2</sup> (acquired in HS-AFM observations); scan area,  $80 \times 64$  nm<sup>2</sup>; frame rate, 3.3 fps.

84 **Supplementary Video 11. HS-AFM videos of CaMKII $\alpha$ <sub>T286A</sub> and CaMKII $\beta$ <sub>T287A</sub>**  
85 **homooligomers treated with Ca<sup>2+</sup>/CaM (1 mM Ca<sup>2+</sup> and 800 nM CaM) on a P[5]A+-**  
86 **modified mica surface.** An enlarged view of the white dotted box is presented on the  
87 right. White dotted circles indicate Ca<sup>2+</sup>/CaM bound to the kinase domains, and white  
88 dots indicate the center of the kinase domains. Frame rate, 3.3 fps.
